# Supplementary material for: Trait choice profoundly affected the ecological conclusions drawn from functional diversity measures
Source: PubMed Central journal article supplement (PMC5473860; doi:10.1038/s41598-017-03812-8), 2017-06-16
Supplement: 41598_2017_3812_MOESM1_ESM.pdf [file 41598_2017_3812_MOESM1_ESM.pdf]

1 **Supplementary Information**

2

3 **Trait choice profoundly affected the ecological conclusions drawn**  
4 **from functional diversity measures**

5

6 Linhai Zhu, Bojie Fu \*, Huoxing Zhu, Cong Wang, Lei Jiao, Ji Zhou

7

8

9 \* Corresponding author

10 Bojie Fu

11 Email address: [bfu@rcees.ac.cn](mailto:bfu@rcees.ac.cn)

12 Telephone: +86-10-62923557

## 13 **The description of the data sets used**

14 The Loess Plateau data set was collected in semi-arid grasslands of the  
15 Yangjuangou catchment (36°42' N, 109°31' E) in the middle of the Loess Plateau of  
16 China. In August and September of 2013 and 2014, during the peak of vegetative  
17 growth, 96 quadrats (1 m × 1 m) were surveyed to determine species composition and  
18 abundance. In each quadrat, we identified as many species as possible and visually  
19 estimated their abundance (vertical projective coverage). For the 28 species present in  
20 the quadrat, we measured vegetative height, root mass fraction, area of a leaf, leaf dry  
21 matter content, specific leaf area, leaf nitrogen concentration, leaf carbon  
22 concentration, leaf phosphorous concentration, force to tear of leaves, force to punch  
23 of leaves, force to tear of roots, depth of roots, lateral extent of roots  
24 ([Pérez-Harguindeguy et al. 2013](#)).

25 The Arizona data set was sampled in the herbaceous understory of ponderosa  
26 pine forests in the Coconino National Forest, Arizona, USA ([Shipley et al. 2011](#)). We  
27 used the 13 quantitative traits and abundances of 79 species in 96 quadrats. The  
28 percentage cover of species was visually estimated to obtain their relative abundances.  
29 The traits are vegetative height, area of a leaf, leaf dry matter content, specific leaf  
30 area, specific root length, seed mass, flowering duration, leaf carbon concentration,  
31 leaf nitrogen concentration, fine-root carbon concentration, fine-root nitrogen  
32 concentration, leaf  $\delta^{13}\text{C}$ , and leaf  $\delta^{15}\text{N}$ .

33 The Jena Experiment is one of the longest running biodiversity experiments in  
34 Europe ([Roscher et al. 2004](#); [Weigelt et al. 2010](#)). The experimental site is located on  
35 the floodplain of the Saale river (altitude 130 m NN) at the northern edge of Jena  
36 (Jena-Löbstedt, Thuringia, Germany). In this experiment, a gradient of plant species  
37 richness (1, 2, 4, 8, 16 and 60 species) and functional richness (1, 2, 3, 4 functional  
38 groups) was established in the 82 grassland plots of 20 × 20 m in May 2002. The  
39 biomass was harvested and sorted to species from 3 - 4 subplots of 0.2 × 0.5 m per  
40 experimental plot from September 2002 to August 2008. The harvest was  
41 implemented once in 2002 and twice in the other years (once in May or June, once in

42 August). The original biomass data includes a total of 3960 observations. Deleting the  
43 observations with missing values yielded the abundance data of 3281 observations.  
44 The original data set contains the information on 60 species common to Central  
45 Europe semi-natural grasslands. Only the trait values of 58 species were extracted  
46 from the literature ([Heisse et al. 2007](#)). Therefore, we analysed this data set using the  
47 11 traits and abundances of 58 species. The traits are seed mass, time to seedling  
48 emergence, depth of roots, root mass fraction (converted from shoot-root ratio), dry  
49 mass per shoot, stem mass fraction (stem dry weight per shoot dry weight), leaf mass  
50 fraction (leaf dry weight per shoot dry weight), specific leaf area, leaf area ratio (the  
51 product of specific leaf area and leaf mass fraction), leaf nitrogen concentration per  
52 leaf dry weight, leaf nitrogen concentration per leaf area.

53 The Rehoboth data set was recorded in semi-arid rangelands near the town of  
54 Rehoboth in central Namibia, southern Africa ([Wesuls et al. 2012](#)). The nine  
55 quantitative traits and abundances (percentage cover) of 87 species were measured in  
56 378 plots. The traits include plant maximum height, above cover density (percentage  
57 cover of the plant canopy above a vertically projected contour of the plant), spine  
58 length, leaf ratio (leaf length divided by leaf width), leaf thickness, area of a leaf,  
59 specific leaf area, seed length, and diaspore length.

60 The Lieu-dit Aravo data set ([Choler 2005](#)) was collected in the southwestern  
61 Alps (Lieu-dit Aravo, Commune de Valloire, France). This data set includes the  
62 information on eight traits and abundances (percentage cover) of 82 alpine plant  
63 species in 75 sites. The traits are vegetative height, maximum lateral spread of clonal  
64 plants, leaf angle (leaf elevation angle estimated at the middle of the lamina), area of a  
65 leaf, leaf thickness (maximum thickness of a leaf cross section and avoiding the  
66 midrib), specific leaf area, leaf nitrogen concentration, and seed mass.

67 The Mount John data set is from a trial in the New Zealand short-tussock  
68 grasslands, located between the Mount John and Lake Alexandrina ([Scott 1999](#)). This  
69 trial is known as one of the longest running ecological experiments in New Zealand  
70 (>30 years). In 1982, a total of 30 plots of 8 × 50 m were established. We used seven  
71 quantitative traits measured on 51 plant species from this data set ([Laliberté 2011](#)).

72 The trait seed mass was not used, because missing values of this trait exist for 11  
73 species. Two species were also deleted because of the incomplete measurement of  
74 traits. The first species coded as Cera\_font is present in seven plots with its relative  
75 abundance ranging from 0.002% to 0.054%. The second species coded as Pter\_veno is  
76 present only in one plot with a relative abundance 0.002%. Therefore, the deletion of  
77 these two species might have little effect on the results. The traits are reproductive  
78 height, leaf dry matter content, leaf nitrogen concentration, leaf phosphorous  
79 concentration, leaf sulfur concentration, specific leaf area, area of a leaf, and seed  
80 mass. Percentage cover was measured as relative abundance of each species.

81

## 82 **References**

- 83 Choler, P. Consistent shifts in alpine plant traits along a mesotopographical gradient.  
84 *Arct. Antarct. Alp. Res.* **37**, 444-453 (2005).
- 85 Heisse, K., Roscher, C., Schumacher, J. & Schulze, E.D. Establishment of grassland  
86 species in monocultures: different strategies lead to success. *Oecologia* **152**,  
87 435-447 (2007).
- 88 Laliberté E. *Land-use intensification in grazing systems: plant trait responses and*  
89 *feedbacks to ecosystem functioning and resilience*. PhD thesis, University of  
90 Canterbury, Christchurch (2011).
- 91 Pérez-Harguindeguy, N. *et al.* New handbook for standardised measurement of plant  
92 functional traits worldwide. *Australian Journal of Botany*, **61**, 167-234 (2013).
- 93 Roscher, C. *et al.* The role of biodiversity for element cycling and trophic interactions:  
94 an experimental approach in a grassland community. *Basic Appl. Ecol.* **5**,  
95 107-121 (2004).
- 96 Scott, D. Sustainability of New Zealand high-country pastures under contrasting  
97 development inputs. 1. Site, and shoot nutrients. *New Zealand Journal of*  
98 *Agricultural Research*, **42**, 365-383 (1999).

- 99 Shipley, B., Laughlin, D.C., Sonnier, G. & Otfinowski, R. A strong test of a maximum  
100 entropy model of trait-based community assembly. *Ecology* **92**, 507-517 (2011).
- 101 Weigelt, A. et al. The Jena Experiment: six years of data from a grassland biodiversity  
102 experiment. *Ecology* **91**, 930 (2010).
- 103 Wesuls, D., Oldeland, J. & Dray, S. Disentangling plant trait responses to livestock  
104 grazing from spatio-temporal variation: the partial RLQ approach. *J. Veg. Sci.* **23**,  
105 98-113 (2012).

106 **Supplementary Table S1. The six data sets used**

| Data set                | Quadrat number | Species number <sup>1</sup> | Trait number |      |      |              |       | Species richness<br>(Range) |
|-------------------------|----------------|-----------------------------|--------------|------|------|--------------|-------|-----------------------------|
|                         |                |                             | Whole-plant  | Leaf | Root | Regenerative | Total |                             |
| Loess Plateau, China    | 96             | 27                          | 2            | 8    | 3    |              | 13    | 2 - 13                      |
| Arizona, USA            | 96             | 79                          | 1            | 7    | 3    | 2            | 13    | 1 - 17                      |
| Jena, German            | 3281           | 58                          | 5            | 3    | 1    | 2            | 11    | 1 - 28                      |
| Rehoboth, Namibia       | 378            | 87                          | 3            | 4    |      | 2            | 9     | 1 - 28                      |
| Lieu-dit Aravo, France  | 75             | 82                          | 2            | 5    |      | 1            | 8     | 5 - 29                      |
| Mount John, New Zealand | 30             | 51                          | 1            | 6    |      |              | 7     | 12 - 31                     |

107 <sup>1</sup> Species number was the total of species present in all the quadrats.

**Supplementary Table S2. The abbreviations for the traits.** The mark ✓ indicates that the trait is included in the data set.

| Traits                                 | Abbreviations                         | Loess Plateau, China | Arizona, USA | Jena, German | Rehoboth, Namibia | Lieu-dit Aravo, France | Mount John, New Zealand |
|----------------------------------------|---------------------------------------|----------------------|--------------|--------------|-------------------|------------------------|-------------------------|
| <i>Whole-plant Traits</i>              |                                       |                      |              |              |                   |                        |                         |
| Vegetative height                      | Hv                                    | ✓                    | ✓            |              |                   | ✓                      |                         |
| Reproductive height                    | Hr                                    |                      |              |              |                   |                        | ✓                       |
|                                        | height <small>(not specified)</small> |                      |              |              | ✓                 |                        |                         |
| Root mass fraction                     | RMF                                   | ✓                    |              | ✓            |                   |                        |                         |
| Dry mass per shoot                     | ShootMass                             |                      |              | ✓            |                   |                        |                         |
| Stem mass fraction                     | SMF                                   |                      |              | ✓            |                   |                        |                         |
| Leaf mass fraction                     | LMF                                   |                      |              | ✓            |                   |                        |                         |
| Leaf area ratio                        | LAR                                   |                      |              | ✓            |                   |                        |                         |
| Above cover density                    | ACD                                   |                      |              |              | ✓                 |                        |                         |
| Lateral spread of plants               | Spread                                |                      |              |              |                   | ✓                      |                         |
| Spine length                           | SpiLen                                |                      |              |              | ✓                 |                        |                         |
| <i>Leaf traits</i>                     |                                       |                      |              |              |                   |                        |                         |
| Area of a leaf                         | Area                                  | ✓                    | ✓            |              | ✓                 | ✓                      | ✓                       |
| Leaf dry matter content                | LDMC                                  | ✓                    | ✓            |              |                   |                        | ✓                       |
| Specific leaf area                     | SLA                                   | ✓                    | ✓            | ✓            | ✓                 | ✓                      | ✓                       |
| Mass-based leaf nitrogen concentration | LN                                    | ✓                    |              | ✓            |                   | ✓                      |                         |
| Area-based leaf nitrogen concentration | LNa                                   |                      |              | ✓            |                   |                        |                         |
| Leaf carbon concentration              | LC                                    | ✓                    | ✓            |              |                   |                        |                         |
| Leaf phosphorous concentration         | LP                                    | ✓                    | ✓            |              |                   |                        | ✓                       |
| Leaf sulfur concentration              | LS                                    |                      |              |              |                   |                        | ✓                       |

**Supplementary Table S2. The abbreviations for the traits (continued).**

| Traits                           | Abbreviations | Loess Plateau, China | Arizona, USA | Jena, German | Rehoboth, Namibia | Lieu-dit Aravo, France | Mount John, New Zealand |
|----------------------------------|---------------|----------------------|--------------|--------------|-------------------|------------------------|-------------------------|
| <i>Leaf traits</i>               |               |                      |              |              |                   |                        |                         |
| Leaf $\delta^{13}\text{C}$       | L13C          |                      | ✓            |              |                   |                        |                         |
| Leaf $\delta^{15}\text{N}$       | L15N          |                      | ✓            |              |                   |                        |                         |
| Leaf ratio                       | LWRatio       |                      |              |              | ✓                 |                        |                         |
| Leaf thickness                   | LT            |                      |              |              | ✓                 |                        |                         |
| Leaf angle                       | LAngle        |                      |              |              |                   | ✓                      |                         |
| Force to tear of leaves          | LFt           | ✓                    |              |              |                   | ✓                      |                         |
| Force to punch of leaves         | LFp           | ✓                    |              |              |                   |                        |                         |
| <i>Below-ground traits</i>       |               |                      |              |              |                   |                        |                         |
| Depth of roots                   | RDepth        | ✓                    |              | ✓            |                   |                        |                         |
| Lateral extent of roots          | RLateral      | ✓                    |              |              |                   |                        |                         |
| Specific root length             | SRL           |                      | ✓            |              |                   |                        |                         |
| Fine-root carbon concentration   | RC            |                      | ✓            |              |                   |                        |                         |
| Fine-root nitrogen concentration | RN            |                      | ✓            |              |                   |                        |                         |
| Force to tear of roots           | RFt           | ✓                    |              |              |                   |                        |                         |
| <i>Regenerative traits</i>       |               |                      |              |              |                   |                        |                         |
| Seed mass                        | SeedMass      |                      | ✓            | ✓            |                   | ✓                      | ✓                       |
| Seed length                      | SeedLen       |                      |              |              | ✓                 |                        |                         |
| Diaspore length                  | DiaLen        |                      |              |              | ✓                 |                        |                         |
| Time to seedling emergence       | SeedEmerg     |                      |              | ✓            |                   |                        |                         |
| Flowering duration               | FlrDuration   |                      | ✓            |              |                   |                        |                         |



110 **Supplementary Table S3. Trait correlation in the Loess Plateau data set.** The upper/right part shows correlation coefficients  
 111 calculated pairwise, and the lower/left part contains the corresponding P values. The P values smaller than 0.05 are in bold.  
 112 About 26% (20 coefficients) of 78 correlation coefficients are significant ( $P \leq 0.05$ ). See the abbreviations for traits in the Table  
 113 S2.

|          | Hv          | Area        | LDMC        | SLA         | LC          | LN          | LP          | LFt         | LFp   | RFt   | RDepth      | RLateral    | RMF   |
|----------|-------------|-------------|-------------|-------------|-------------|-------------|-------------|-------------|-------|-------|-------------|-------------|-------|
| Hv       |             | 0.04        | 0.39        | 0.02        | 0.55        | 0.21        | 0.04        | 0.30        | 0.03  | -0.18 | 0.37        | 0.29        | -0.22 |
| Area     | 0.85        |             | -0.05       | 0.11        | -0.25       | -0.20       | -0.02       | -0.03       | 0.16  | 0.34  | 0.47        | 0.09        | 0.10  |
| LDMC     | <b>0.05</b> | 0.79        |             | -0.48       | 0.56        | -0.39       | -0.67       | 0.58        | 0.49  | -0.06 | 0.14        | 0.34        | 0.27  |
| SLA      | 0.91        | 0.57        | <b>0.01</b> |             | -0.04       | 0.19        | 0.40        | -0.17       | -0.23 | 0.11  | -0.15       | -0.24       | -0.40 |
| LC       | <b>0.00</b> | 0.20        | <b>0.00</b> | 0.85        |             | 0.00        | -0.14       | 0.22        | 0.02  | -0.07 | 0.24        | 0.51        | 0.05  |
| LN       | 0.29        | 0.33        | <b>0.04</b> | 0.34        | 0.99        |             | 0.71        | -0.38       | -0.43 | 0.00  | 0.26        | -0.11       | -0.24 |
| LP       | 0.86        | 0.91        | <b>0.00</b> | <b>0.04</b> | 0.50        | <b>0.00</b> |             | -0.54       | -0.48 | 0.08  | 0.22        | -0.02       | -0.15 |
| LFt      | 0.12        | 0.89        | <b>0.00</b> | 0.39        | 0.27        | <b>0.05</b> | <b>0.00</b> |             | 0.41  | -0.01 | -0.07       | 0.05        | -0.03 |
| LFp      | 0.89        | 0.42        | <b>0.01</b> | 0.26        | 0.94        | <b>0.02</b> | <b>0.01</b> | <b>0.03</b> |       | 0.20  | -0.16       | -0.20       | 0.08  |
| RFt      | 0.37        | 0.08        | 0.75        | 0.59        | 0.72        | 1.00        | 0.70        | 0.97        | 0.31  |       | -0.07       | -0.10       | -0.12 |
| RDepth   | 0.06        | <b>0.01</b> | 0.48        | 0.44        | 0.22        | 0.18        | 0.26        | 0.71        | 0.41  | 0.72  |             | 0.66        | 0.18  |
| RLateral | 0.14        | 0.64        | 0.08        | 0.22        | <b>0.01</b> | 0.59        | 0.93        | 0.81        | 0.31  | 0.61  | <b>0.00</b> |             | 0.43  |
| RMF      | 0.27        | 0.61        | 0.18        | <b>0.04</b> | 0.79        | 0.23        | 0.46        | 0.87        | 0.68  | 0.57  | 0.36        | <b>0.02</b> |       |

114 **Supplementary Table S4. Trait correlation in the Arizona data set.** The upper/right part shows correlation coefficients  
 115 calculated pairwise, and the lower/left part contains the corresponding P values. The P values smaller than 0.05 are in bold.  
 116 About 32% (25 coefficients) of 78 correlation coefficients are significant ( $P \leq 0.05$ ). See the abbreviations for traits in the Table  
 117 S2.

|             | Hv          | Area        | LDMC        | SLA         | SRL         | SeedMass    | FlrDuration | LC          | LN          | L13C  | L15N        | RC    | RN    |
|-------------|-------------|-------------|-------------|-------------|-------------|-------------|-------------|-------------|-------------|-------|-------------|-------|-------|
| Hv          |             | 0.51        | 0.22        | -0.14       | -0.15       | 0.29        | -0.14       | 0.11        | -0.06       | -0.03 | 0.01        | 0.01  | -0.05 |
| Area        | <b>0.00</b> |             | -0.01       | -0.04       | -0.22       | 0.18        | 0.22        | 0.17        | 0.09        | 0.13  | -0.10       | 0.00  | 0.00  |
| LDMC        | <b>0.06</b> | 0.91        |             | -0.47       | -0.20       | -0.09       | 0.03        | 0.24        | -0.50       | -0.34 | -0.15       | 0.08  | -0.33 |
| SLA         | 0.22        | 0.71        | <b>0.00</b> |             | 0.44        | -0.04       | -0.08       | -0.25       | 0.51        | 0.02  | 0.04        | -0.14 | 0.29  |
| SRL         | 0.20        | <b>0.05</b> | 0.08        | <b>0.00</b> |             | -0.30       | -0.36       | -0.34       | 0.07        | -0.47 | 0.23        | -0.01 | 0.02  |
| SeedMass    | <b>0.01</b> | 0.12        | 0.45        | 0.74        | <b>0.01</b> |             | 0.16        | 0.09        | 0.41        | 0.17  | 0.00        | 0.01  | 0.39  |
| FlrDuration | 0.20        | <b>0.05</b> | 0.78        | 0.50        | <b>0.00</b> | 0.15        |             | 0.01        | 0.16        | 0.14  | -0.01       | 0.02  | 0.20  |
| LC          | 0.34        | 0.14        | <b>0.03</b> | <b>0.02</b> | <b>0.00</b> | 0.45        | 0.95        |             | -0.14       | 0.12  | -0.30       | 0.09  | -0.14 |
| LN          | 0.60        | 0.43        | <b>0.00</b> | <b>0.00</b> | 0.53        | <b>0.00</b> | 0.16        | 0.21        |             | 0.24  | 0.13        | -0.13 | 0.64  |
| L13C        | 0.78        | 0.27        | <b>0.00</b> | 0.88        | <b>0.00</b> | 0.12        | 0.22        | 0.28        | <b>0.03</b> |       | -0.20       | -0.10 | -0.01 |
| L15N        | 0.92        | 0.40        | 0.19        | 0.74        | <b>0.04</b> | 0.97        | 0.95        | <b>0.01</b> | 0.25        | 0.08  |             | 0.12  | 0.26  |
| RC          | 0.96        | 0.99        | 0.49        | 0.21        | 0.96        | 0.92        | 0.86        | 0.41        | 0.25        | 0.38  | 0.31        |       | -0.04 |
| RN          | 0.64        | 0.99        | <b>0.00</b> | <b>0.01</b> | 0.85        | <b>0.00</b> | 0.08        | 0.22        | <b>0.00</b> | 0.93  | <b>0.02</b> | 0.70  |       |

118 **Supplementary Table S5. Trait correlation in the Jena data set.** The upper/right part shows correlation coefficients  
 119 calculated pairwise, and the lower/left part contains the corresponding P values. The P values smaller than 0.05 are in bold.  
 120 About 58% (32 coefficients) of 55 correlation coefficients are significant ( $P \leq 0.05$ ). See the abbreviations for traits in the  
 121 Table S2.

|                 | SeedMass    | SeedEmerg   | RDepth      | RMF         | ShootMass   | SMF         | LMF         | SLA         | LAR         | LN          | LN <sub>a</sub> |
|-----------------|-------------|-------------|-------------|-------------|-------------|-------------|-------------|-------------|-------------|-------------|-----------------|
| SeedMass        |             | -0.23       | 0.39        | -0.14       | 0.07        | 0.21        | -0.16       | -0.13       | -0.19       | 0.45        | 0.51            |
| SeedEmerg       | 0.09        |             | -0.43       | 0.29        | -0.25       | -0.30       | 0.31        | -0.15       | 0.18        | 0.03        | 0.29            |
| RDepth          | <b>0.00</b> | <b>0.00</b> |             | -0.20       | 0.54        | 0.31        | -0.31       | 0.32        | -0.05       | 0.42        | 0.07            |
| RMF             | 0.28        | <b>0.03</b> | 0.14        |             | -0.35       | -0.53       | 0.54        | -0.32       | 0.31        | -0.25       | 0.00            |
| ShootMass       | 0.61        | 0.06        | <b>0.00</b> | <b>0.01</b> |             | 0.22        | -0.28       | 0.31        | -0.06       | 0.21        | -0.04           |
| SMF             | 0.11        | <b>0.02</b> | <b>0.02</b> | <b>0.00</b> | 0.10        |             | -0.98       | 0.49        | -0.68       | 0.46        | -0.03           |
| LMF             | 0.23        | <b>0.02</b> | <b>0.02</b> | <b>0.00</b> | <b>0.03</b> | <b>0.00</b> |             | -0.49       | 0.71        | -0.44       | 0.05            |
| SLA             | 0.33        | 0.28        | <b>0.02</b> | <b>0.01</b> | <b>0.02</b> | <b>0.00</b> | <b>0.00</b> |             | 0.22        | 0.35        | -0.48           |
| LAR             | 0.15        | 0.18        | 0.72        | <b>0.02</b> | 0.67        | <b>0.00</b> | <b>0.00</b> | 0.10        |             | -0.26       | -0.35           |
| LN              | <b>0.00</b> | 0.84        | <b>0.00</b> | 0.06        | 0.12        | <b>0.00</b> | <b>0.00</b> | <b>0.01</b> | <b>0.05</b> |             | 0.55            |
| LN <sub>a</sub> | <b>0.00</b> | <b>0.03</b> | 0.59        | 0.99        | 0.79        | 0.80        | 0.72        | <b>0.00</b> | <b>0.01</b> | <b>0.00</b> |                 |

122 **Supplementary Table S6. Trait correlation in the Rehoboth data set.** The upper/right part shows correlation coefficients  
 123 calculated pairwise, and the lower/left part contains the corresponding P values. The P values smaller than 0.05 are in bold.  
 124 About 39% (14 coefficients) of 36 correlation coefficients are significant ( $P \leq 0.05$ ). See the abbreviations for traits in the  
 125 Table S2.

|          | height      | ACD         | LWRatio     | LT          | Area        | SLA         | SpineLen    | SeedLen     | DiaLen |
|----------|-------------|-------------|-------------|-------------|-------------|-------------|-------------|-------------|--------|
| height   |             | -0.04       | -0.04       | 0.11        | -0.01       | -0.21       | 0.54        | 0.52        | 0.10   |
| ACD      | 0.74        |             | -0.23       | 0.19        | 0.12        | -0.22       | 0.03        | 0.16        | 0.14   |
| LWRatio  | 0.69        | <b>0.03</b> |             | -0.21       | -0.06       | -0.15       | -0.13       | -0.01       | 0.01   |
| LT       | 0.33        | 0.08        | <b>0.05</b> |             | 0.32        | -0.09       | 0.16        | 0.33        | 0.41   |
| Area     | 0.92        | 0.26        | 0.56        | <b>0.00</b> |             | 0.03        | -0.04       | 0.26        | 0.10   |
| SLA      | <b>0.05</b> | <b>0.04</b> | 0.16        | 0.43        | 0.79        |             | -0.23       | -0.22       | -0.03  |
| SpineLen | <b>0.00</b> | 0.75        | 0.25        | 0.13        | 0.70        | <b>0.03</b> |             | 0.45        | 0.06   |
| SeedLen  | <b>0.00</b> | 0.15        | 0.96        | <b>0.00</b> | <b>0.02</b> | <b>0.04</b> | <b>0.00</b> |             | 0.34   |
| DiaLen   | 0.34        | 0.18        | 0.91        | <b>0.00</b> | 0.35        | 0.77        | 0.58        | <b>0.00</b> |        |

126 **Supplementary Table S7. Trait correlation in the Lieu-dit Aravo data set.** The upper/right part shows correlation  
 127 coefficients calculated pairwise, and the lower/left part contains the corresponding P values. The P values smaller than  
 128 0.05 are in bold. About 29% (8 coefficients) of 28 correlation coefficients are significant ( $P \leq 0.05$ ). See the abbreviations  
 129 for traits in the Table S2.

|          | Hv          | Spread | LAngle      | Area        | LT          | SLA         | LN    | SeedMass |
|----------|-------------|--------|-------------|-------------|-------------|-------------|-------|----------|
| Hv       |             | -0.22  | 0.41        | 0.12        | -0.07       | -0.14       | -0.11 | 0.15     |
| Spread   | <b>0.05</b> |        | -0.17       | 0.09        | -0.19       | -0.04       | 0.14  | 0.03     |
| LAngle   | <b>0.00</b> | 0.12   |             | -0.33       | 0.17        | -0.33       | -0.20 | 0.07     |
| Area     | 0.29        | 0.41   | <b>0.00</b> |             | -0.07       | 0.20        | 0.06  | 0.26     |
| LT       | 0.55        | 0.09   | 0.13        | 0.53        |             | -0.39       | -0.41 | 0.02     |
| SLA      | 0.22        | 0.69   | <b>0.00</b> | 0.07        | <b>0.00</b> |             | 0.75  | -0.09    |
| LN       | 0.34        | 0.21   | 0.07        | 0.62        | <b>0.00</b> | <b>0.00</b> |       | 0.10     |
| SeedMass | 0.17        | 0.80   | 0.53        | <b>0.02</b> | 0.84        | 0.44        | 0.35  |          |

130 **Supplementary Table S8. Trait correlation in the Mount John data set.** The upper/right part shows correlation  
 131 coefficients calculated pairwise, and the lower/left part contains the corresponding P values. The P values smaller than  
 132 0.05 are in bold. About 62% (13 coefficients) of 21 correlation coefficients are significant ( $P \leq 0.05$ ). See the abbreviations  
 133 for traits in the Table S2.

|      | Hr          | LDMC        | LN          | LP          | LS          | SLA   | Area  |
|------|-------------|-------------|-------------|-------------|-------------|-------|-------|
| Hr   |             | -0.01       | 0.24        | 0.02        | 0.11        | 0.19  | 0.50  |
| LDMC | 0.95        |             | -0.68       | -0.67       | -0.54       | -0.64 | -0.33 |
| LN   | 0.08        | <b>0.00</b> |             | 0.61        | 0.75        | 0.64  | 0.37  |
| LP   | 0.89        | <b>0.00</b> | <b>0.00</b> |             | 0.77        | 0.62  | 0.15  |
| LS   | 0.44        | <b>0.00</b> | <b>0.00</b> | <b>0.00</b> |             | 0.60  | 0.12  |
| SLA  | 0.19        | <b>0.00</b> | <b>0.00</b> | <b>0.00</b> | <b>0.00</b> |       | 0.05  |
| Area | <b>0.00</b> | <b>0.02</b> | <b>0.01</b> | 0.31        | 0.40        | 0.71  |       |

134 **Supplementary Table S9. Estimations of the intrinsic dimensionality of traits for the six data sets.**

| Method                              | Loess Plateau,<br>China | Arizona, USA | Jena, German | Rehoboth,<br>Namibia | Lieu-dit Aravo,<br>France | Mount John,<br>New Zealand |
|-------------------------------------|-------------------------|--------------|--------------|----------------------|---------------------------|----------------------------|
| Cattell's scree test (Cattell 1966) | 4                       | 4            | 4            | 3                    | 4                         | 2                          |
| Kaiser's rule (Kaiser 1960)         | 4                       | 4            | 4            | 4                    | 4                         | 2                          |
| Parallel analysis (Horn 1965)       | 4                       | 4            | 3            | 2                    | 3                         | 2                          |

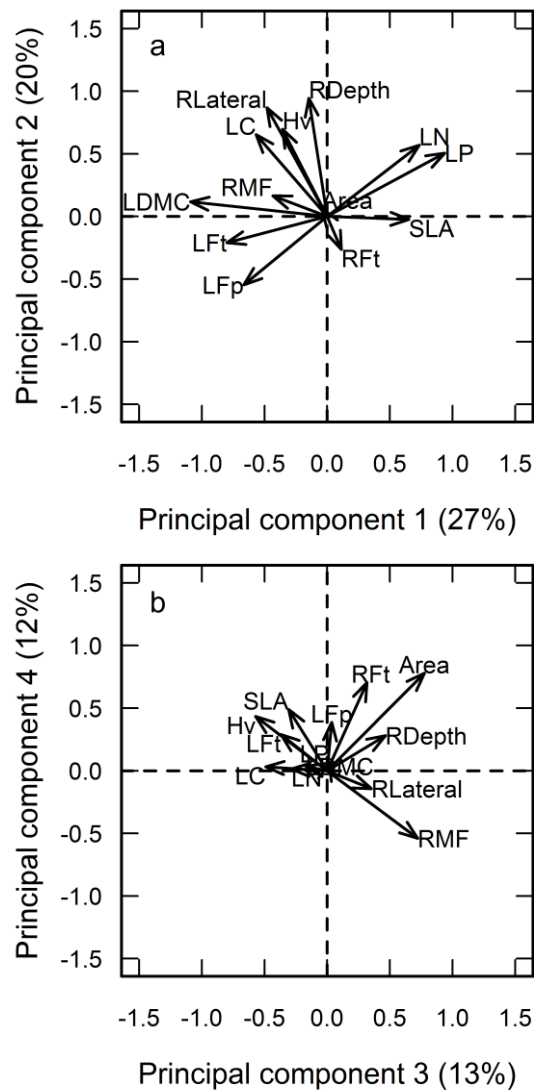

135

136 **Supplementary Figure S1. Principal component analysis for the traits**

137 **in the Loess Plateau data set.** Leaf dry matter content and depth of roots

138 had the highest loadings in the first two axes, respectively. Area of a leaf

139 had the highest loadings in the third and fourth axes. These three traits

140 were used to calculate functional diversity indices in the HL method. See

141 the abbreviations for traits in the Table S2. Values in parentheses after the

142 titles of the coordinates indicate the percentage of the total variance

143 accounted for by each axis.



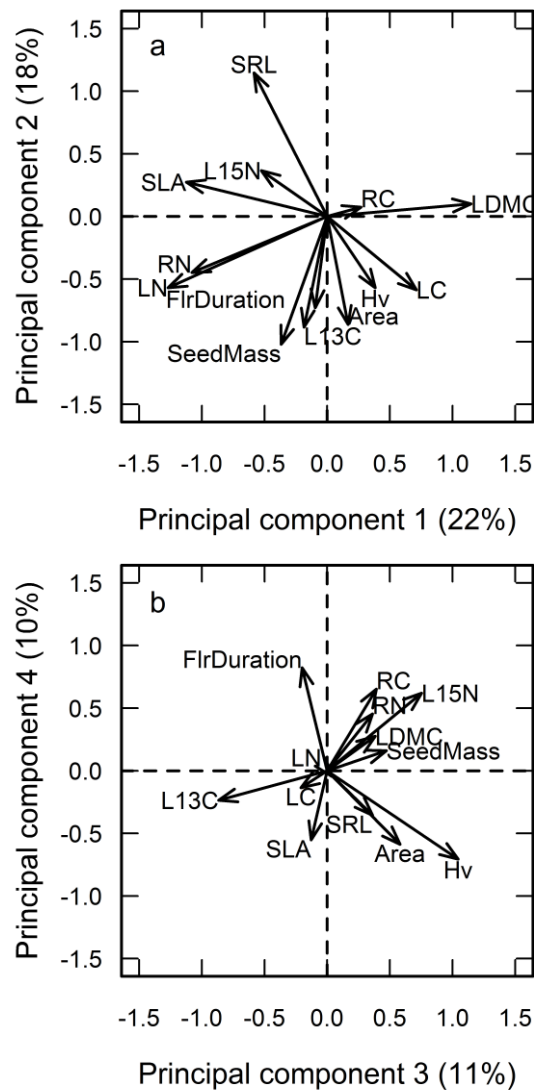

144

145 **Supplementary Figure S2. Principal component analysis for the traits**  
 146 **in the Arizona data set.** Leaf nitrogen concentration, specific root length,  
 147 vegetative height, and flowering duration had the highest loadings in the  
 148 first four axes, respectively. These four traits were used to calculate  
 149 functional diversity indices in the HL method. See the abbreviations for  
 150 traits in the Table S2. Values in parentheses after the titles of the  
 151 coordinates indicate the percentage of the total variance accounted for by  
 152 each axis.

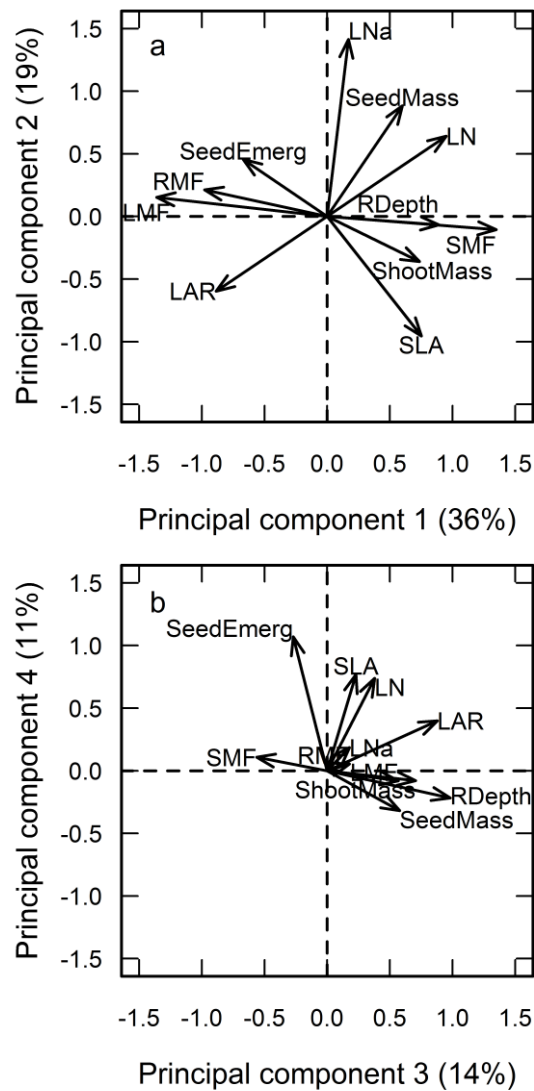

153

154 **Supplementary Figure S3. Principal component analysis for the traits**

155 **in the Jena data set.** Leaf mass fraction, area based leaf nitrogen

156 concentration, depth of roots, and time to seedling emergence had the

157 highest loadings in the first four axes, respectively. These four traits were

158 used to calculate functional diversity indices in the HL method. See the

159 abbreviations for traits in the Table S2. Values in parentheses after the

160 titles of the coordinates indicate the percentage of the total variance

161 accounted for by each axis.

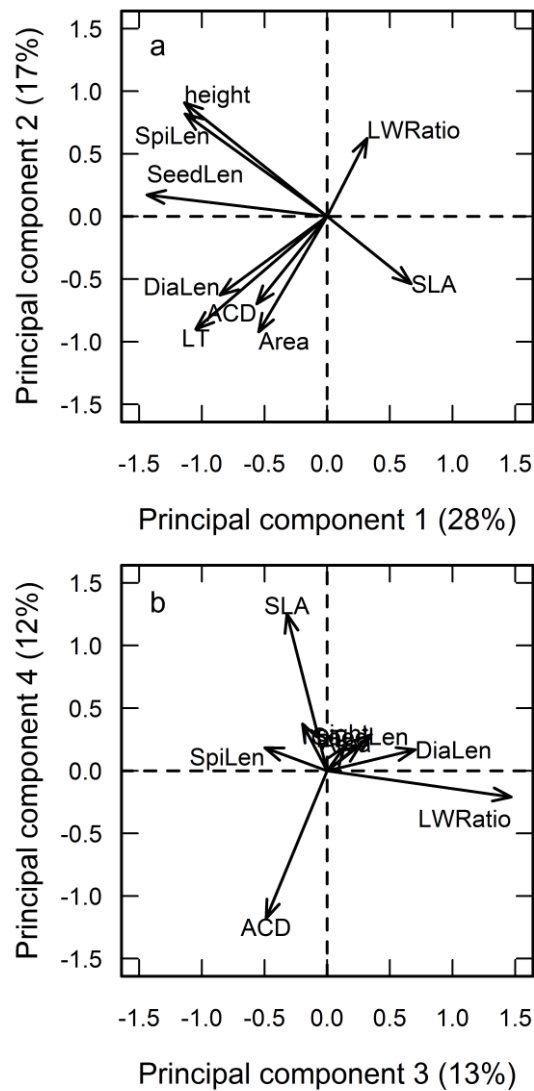

162

163 **Supplementary Figure S4. Principal component analysis for the traits**  
 164 **in the Rehoboth data set.** Seed length, area of a leaf, leaf ratio, and  
 165 specific leaf area had the highest loadings in the first four axes,  
 166 respectively. These four traits were used to calculate functional diversity  
 167 indices in the HL method. See the abbreviations for traits in the Table S2.  
 168 Values in parentheses after the titles of the coordinates indicate the  
 169 percentage of the total variance accounted for by each axis.

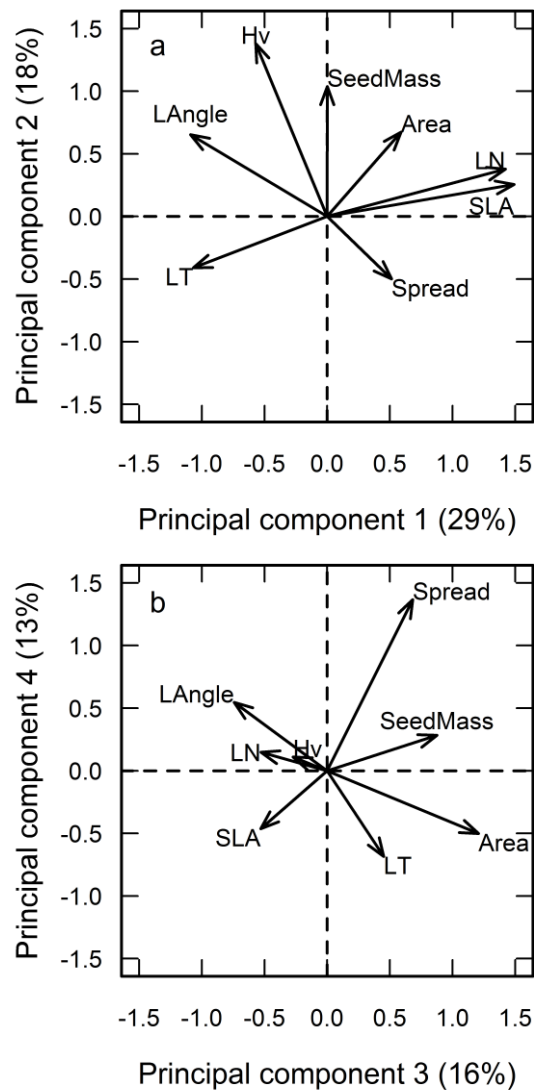

170

171 **Supplementary Figure S5. Principal component analysis for the traits**  
 172 **in the Lieu-dit Aravo data set.** Specific leaf area, vegetative height, area  
 173 of a leaf, and maximum lateral spread of clonal plants had the highest  
 174 loadings in the first four axes, respectively. These four traits were used to  
 175 calculate functional diversity indices in the HL method. See the  
 176 abbreviations for traits in the Table S2. Values in parentheses after the  
 177 titles of the coordinates indicate the percentage of the total variance  
 178 accounted for by each axis.

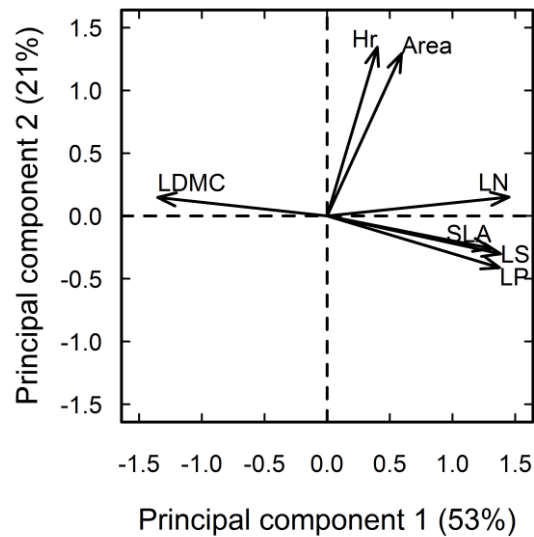

179

180 **Supplementary Figure S6. Principal component analysis for the traits**

181 **in the Mount John data set.** Leaf nitrogen concentration and

182 reproductive height had the highest loadings in the first two axes,

183 respectively. These two traits were used to calculate functional diversity

184 indices in the HL method. See the abbreviations for traits in the Table S2.

185 Values in parentheses after the titles of the coordinates indicate the

186 percentage of the total variance accounted for by each axis.
